# Supplementary material
Source: PubMed Central journal article supplement (PMC3870693)
Supplement: 1310711110_sapp.pdf [file 1310711110_sapp.pdf]

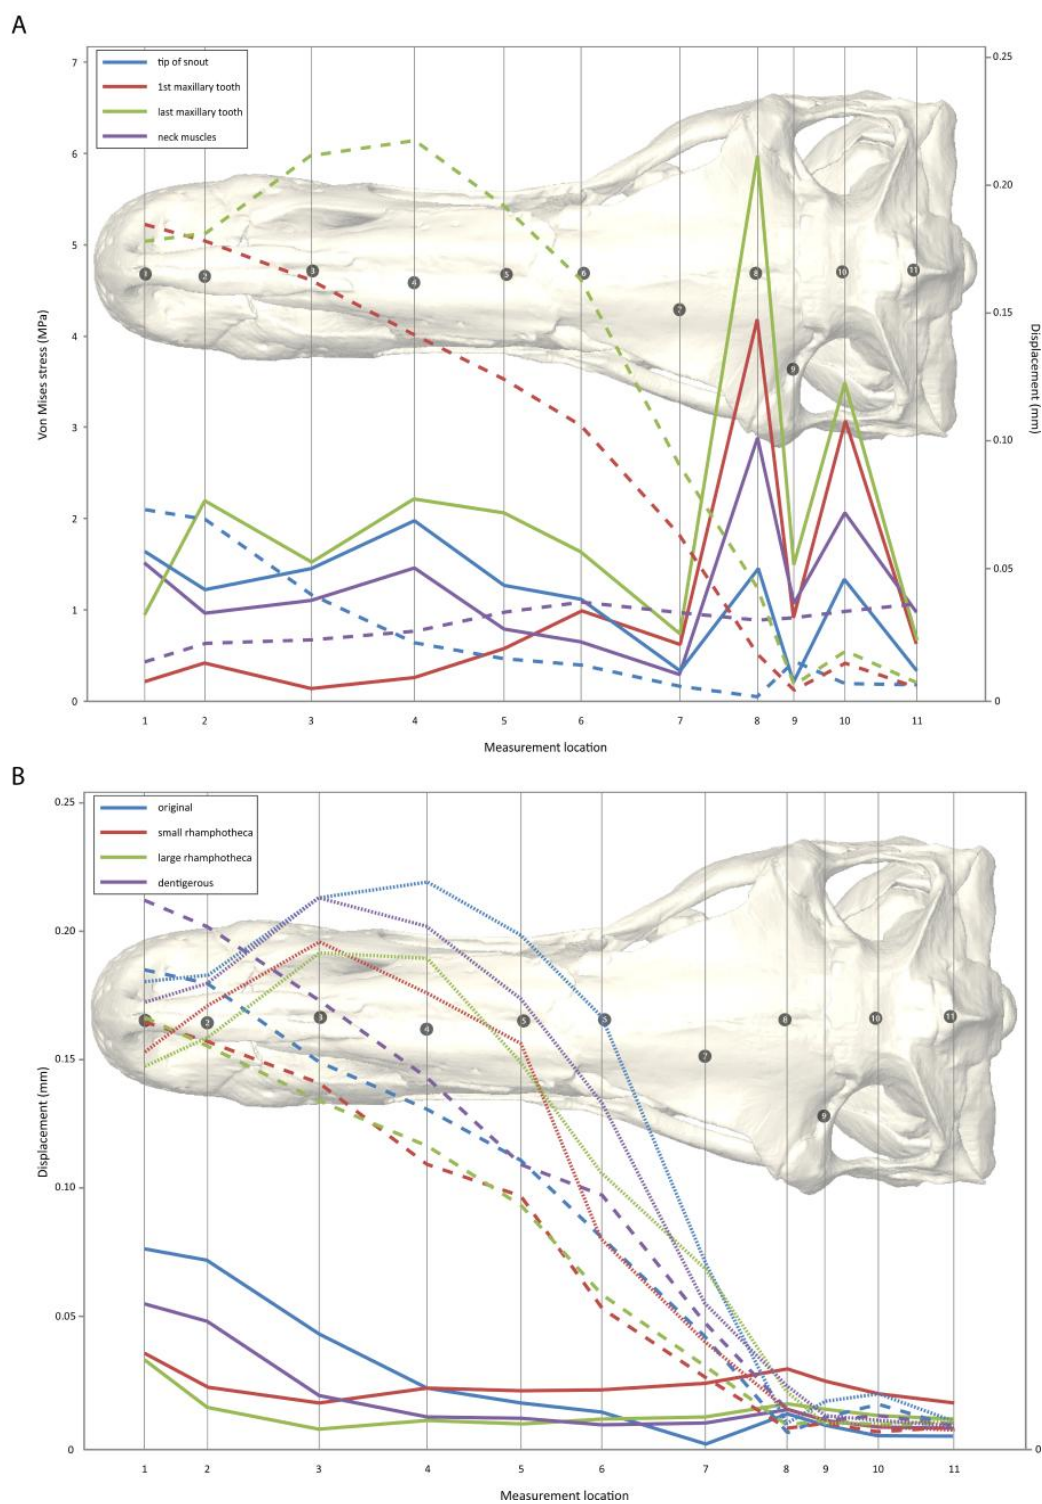

**Fig. S1.** (A) Von Mises stress (solid lines) and displacement (stippled lines) magnitudes in the restored skull model for four different bite scenarios along eleven distinct measurement locations (aligned with the respective position on the skull in the background, comp Table S5). (B).

Displacement in the four different skull configurations for simulated bite at the tip of the snout (solid lines), the first maxillary tooth (large stippled lines), and the last maxillary tooth (small stippled lines).

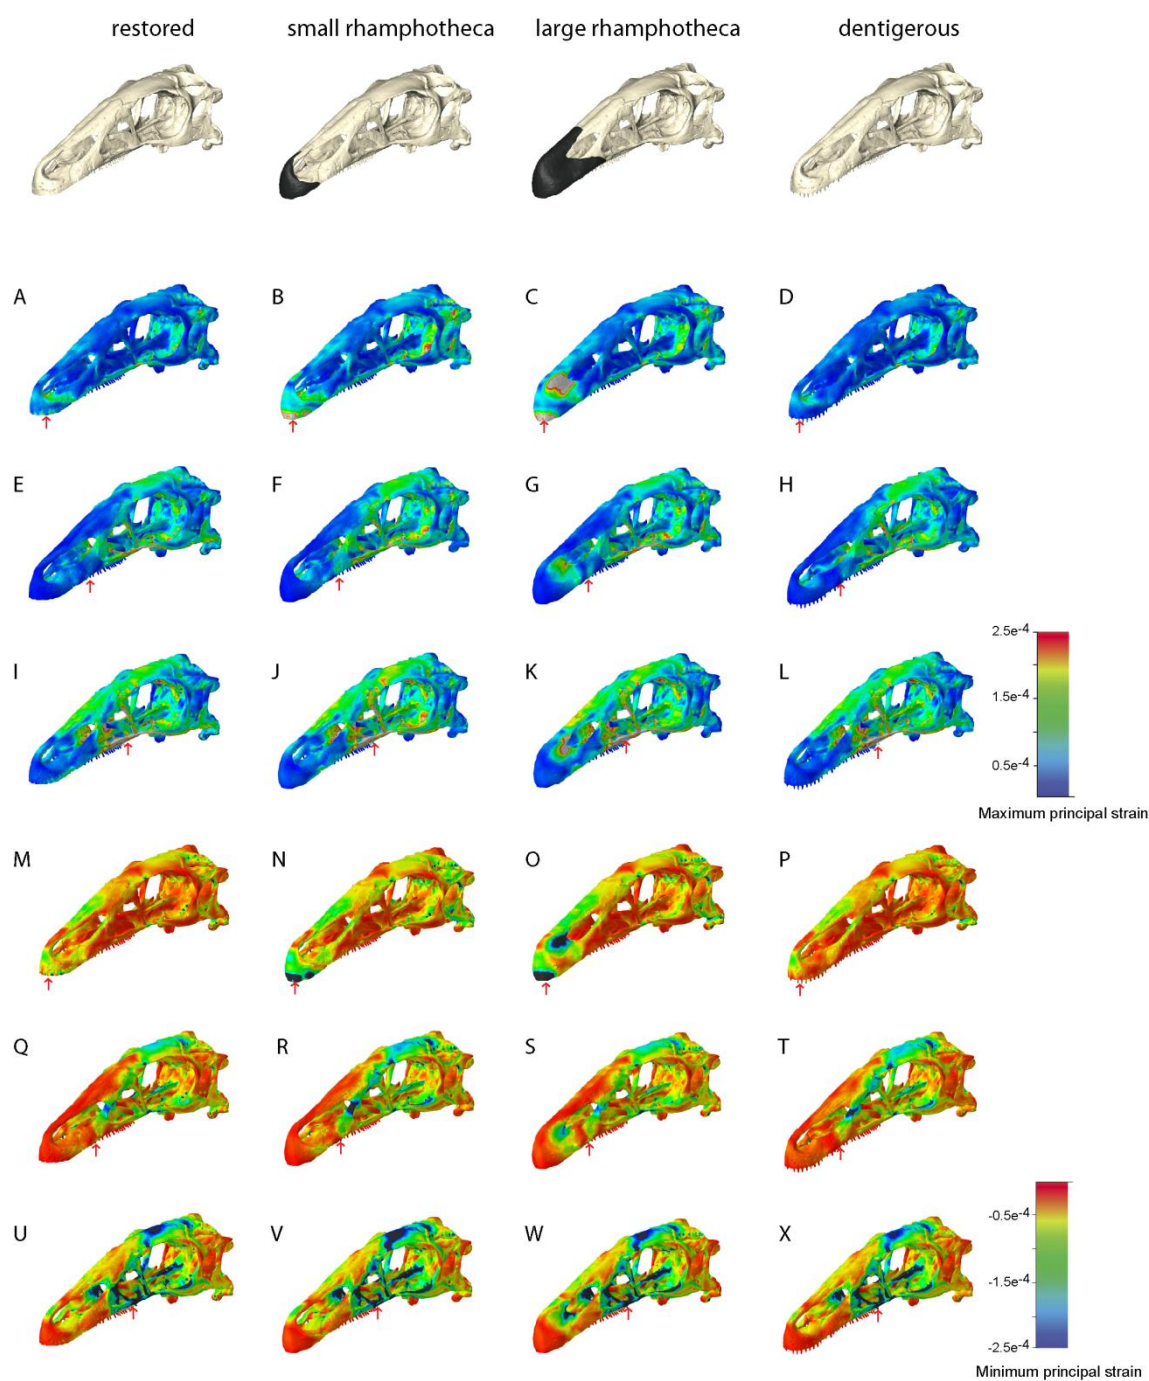

**Fig. S2.** Comparisons of (A–L) Maximum principal strain and (M–X) Minimum principal strain distribution in the different skull configurations of *Erlikosaurus andrewsi* subjected to different bite positions. Each of the four columns presents a different modeled state, from left, restored skull, with small rhamphotheca, with large rhamphotheca, with teeth added to the premaxillae and maxillae. The rows depict different bite positions (indicated by red arrows). Contour plots are scaled to (A–C) 0.00025 peak strain and (D–F) -0.00025 peak strain.

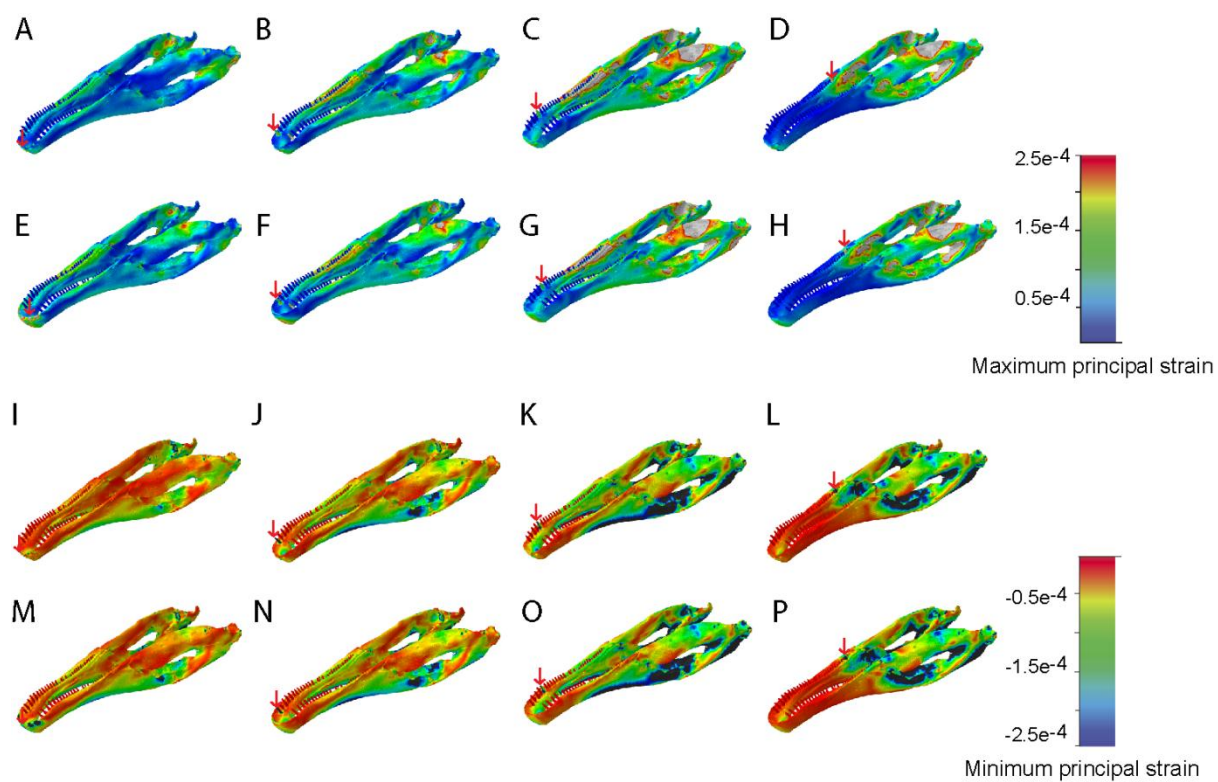

**Fig. S3.** Comparisons of (A–H) Maximum principal strain and (I–P) Minimum principal strain distribution in the different jaw models of *Erlikosaurus andrewsi*. (A–D, I–J) restored lower jaw model, (E–H, M–P) restored lower jaw with rhamphotheca. Each column presents a different bite positions (indicated by red arrows). Contour plots are scaled to (A–H) 9 MPa peak stress and (I–P) 0.25 mm displacement.

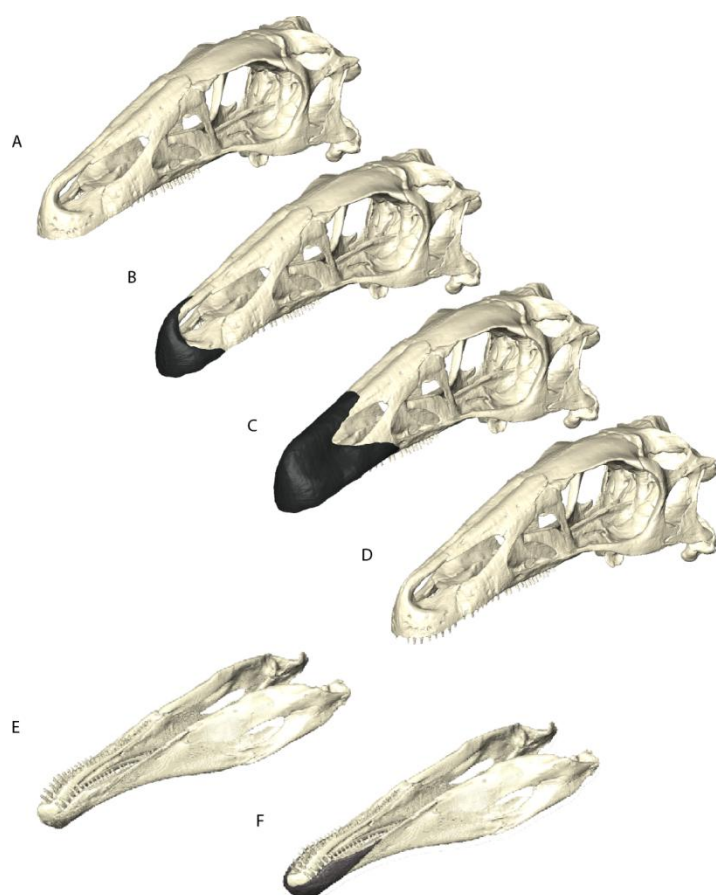

**Fig. S4.** Different skull configurations of *Erlikosaurus andrewsi*. (A) restored skull, (B) skull with small rhamphotheca, (C) skull with large rhamphotheca, (D) skull with teeth added to the premaxilla and maxilla, (E) restored lower jaw, (F) lower jaw with rhamphotheca.

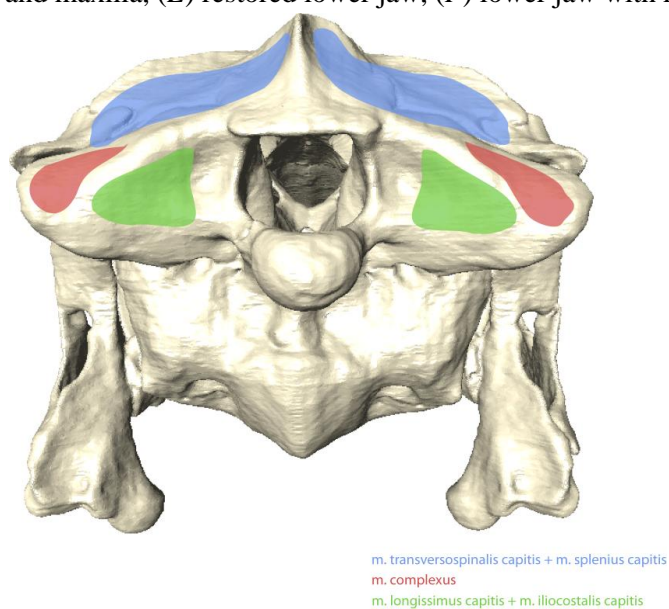

**Fig S5.** Generalized attachment sites of the neck musculature for muscle force calculations (Table S4).

| Model                                   | Number of elements | Surface area [mm <sup>2</sup> ] | Mass [g] |
|-----------------------------------------|--------------------|---------------------------------|----------|
| Restored skull                          | 1 905 393          | 124 815                         | 360      |
| Restored skull with small rhamphotheca  | 1 921 002          | 126 117                         | 365      |
| Restored skull with large rhamphotheca  | 1 989 380          | 128 897                         | 374      |
| Restored skull, fully dentigerous model | 1 961 098          | 125 418                         | 368      |
| Lower jaw                               | 1 007 423          | 60 560                          | 107      |
| Lower jaw plus rhamphotheca             | 1 077 317          | 62 972                          | 111      |
|                                         |                    |                                 |          |
| Premaxillary & maxillary teeth          | -                  | -                               | 3        |
| Small rhamphotheca (skull only)         | -                  | -                               | 5        |
| Large rhamphotheca (skull only)         | -                  | -                               | 15       |

**Table S1.** Size (number of elements, surface area, calculated mass) of the individual FE models. The weight of the individual models and components (Table S1) was calculated by using volumetric measurements for single components and specific densities for bone (1770 kg/m<sup>3</sup>), teeth (2076 kg/m<sup>3</sup>), and keratin (1269 kg/m<sup>3</sup>).



| #  | Model<br>Skull     | Loaded forces    |              | Constraints       |                      |          | Constraints simulating bite process |                     |                      |
|----|--------------------|------------------|--------------|-------------------|----------------------|----------|-------------------------------------|---------------------|----------------------|
|    |                    | Adductor muscles | Neck muscles | Occipital condyle | Paroccipital process | Quadrate | Tip of snout                        | 1st maxillary tooth | Last maxillary tooth |
| 1  | restored           | X                |              | X                 | X                    | X        | X                                   |                     |                      |
| 2  | restored           | X                |              | X                 | X                    | X        |                                     | X                   |                      |
| 3  | restored small     | X                |              | X                 | X                    | X        |                                     |                     | X                    |
| 4  | rhamphotheca small | X                |              | X                 | X                    | X        | X                                   |                     |                      |
| 5  | rhamphotheca small | X                |              | X                 | X                    | X        |                                     | X                   |                      |
| 6  | rhamphotheca large | X                |              | X                 | X                    | X        |                                     |                     | X                    |
| 7  | rhamphotheca large | X                |              | X                 | X                    | X        | X                                   |                     |                      |
| 8  | rhamphotheca large | X                |              | X                 | X                    | X        |                                     | X                   |                      |
| 9  | rhamphotheca       | X                |              | X                 | X                    | X        |                                     |                     | X                    |
| 10 | dentigerous        | X                |              | X                 | X                    | X        | X                                   |                     |                      |
| 11 | dentigerous        | X                |              | X                 | X                    | X        |                                     | X                   |                      |
| 12 | dentigerous        | X                |              | X                 | X                    | X        |                                     |                     | X                    |
| 13 | restored           | X                | X            | X                 |                      | X        | X                                   |                     |                      |
| 14 | restored large     |                  | X            | X                 |                      | X        | X                                   |                     |                      |
| 15 | rhamphotheca large | X                | X            | X                 |                      | X        | X                                   |                     |                      |
| 16 | rhamphotheca       |                  | X            | X                 |                      | X        | X                                   |                     |                      |

**Table S2.** Model setup for different tested FE models of the skull of *Erlisosaurus andrewsi* presented in this study.

| #  | Model<br>Lower jaw       | Loaded forces    |  | Constraints |  | Constraints simulating bite process |                   |                   |                    |
|----|--------------------------|------------------|--|-------------|--|-------------------------------------|-------------------|-------------------|--------------------|
|    |                          | Adductor muscles |  | Glenoid     |  | Tip of dentary                      | 1st dentary tooth | 5th dentary tooth | Last dentary tooth |
| 17 | Lower jaw                | X                |  | X           |  | X                                   |                   |                   |                    |
| 18 | Lower jaw                | X                |  | X           |  |                                     | X                 |                   |                    |
| 19 | Lower jaw                | X                |  | X           |  |                                     |                   | X                 |                    |
| 20 | Lower jaw                | X                |  | X           |  |                                     |                   |                   | X                  |
| 21 | Lower jaw + rhamphotheca | X                |  | X           |  | X                                   |                   |                   |                    |
| 22 | Lower jaw + rhamphotheca | X                |  | X           |  |                                     | X                 |                   |                    |
| 23 | Lower jaw + rhamphotheca | X                |  | X           |  |                                     |                   | X                 |                    |
| 24 | Lower jaw + rhamphotheca | X                |  | X           |  |                                     |                   |                   | X                  |

**Table S3.** Model setup for different tested FE models of the lower jaw of *Erlisosaurus andrewsi* presented in this study.

| Muscle                                                     | Muscle force [N] |
|------------------------------------------------------------|------------------|
| <b>Adductor muscles (muscle forces per side)</b>           |                  |
| m. pterygoideus dorsalis                                   | 55.94            |
| m. pterygoideus ventralis                                  | 182.15           |
| pseudotemporalis profundus                                 | 13.49            |
| m. pseudotemporalis superficialis                          | 44.76            |
| m. adductor mandibulae externus profundus                  | 78.11            |
| m. adductor mandibulae externus medialis                   | 76.80            |
| m. adductor mandibulae externus superficialis              | 83.22            |
| adductor mandibulae posterior                              | 34.86            |
| <b>Cervical muscles (combined for left and right side)</b> |                  |
| m. transversospinalis capitis + m. splenius capitis        | 600              |
| m. complexus                                               | 500              |
| m. longissimus capitis + m. iliocostalis capitis           | 600              |

**Table S4.** Calculated muscle forces for the adductor and neck musculature.

| Measurement location | Description                            |
|----------------------|----------------------------------------|
| 1                    | Nasal process of premaxilla, rostrally |
| 2                    | Nasal process of premaxilla, caudally  |
| 3                    | Nasal/premaxilla contact               |
| 4                    | Dorsal surface of nasal                |
| 5                    | Nasal/frontal contact                  |
| 6                    | Dorsal surface of frontal, rostrally   |
| 7                    | Laterodorsal surface of frontal        |
| 8                    | Frontal/parietal contact               |
| 9                    | Frontal/postorbital contact            |
| 10                   | Dorsal surface of parietal             |
| 11                   | Parietal/supraoccipital contact        |

**Table S5.** Location of measurement sites along the skull of *Erlikosaurus andrewsi* as shown in Fig S1.
